# Supplementary material
Source: Springer Nature journal article supplement (https://www.springermedizin.de/resource/supplementary/13550_2013_164_MOESM3_ESM.pdf/9687706)

**A**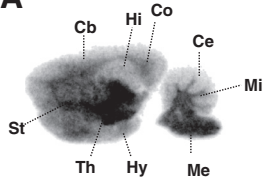**B**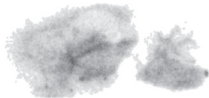**C**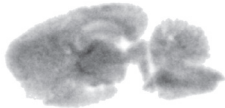

Supplement: MOESM3 [file 9687706]
